# Supplementary material for: Amphipathic Cell-Penetrating Peptide-Aided Delivery of Cas9 RNP for In Vitro Gene Editing and Correction
Source: Pharmaceutics. 2023 Oct 20;15(10):2500. doi: 10.3390/pharmaceutics15102500 (PMC10609989; doi:10.3390/pharmaceutics15102500)
Supplement: Supplementary file 1 [file pharmaceutics-15-02500-s001.zip › pharmaceutics-2641203-supplementary.pdf]

# Amphipathic Cell-Penetrating Peptide-Aided Delivery of Cas9 RNP for In Vitro Gene Editing and Correction

Mert Öktem, Enrico Mastrobattista and Olivier G. de Jong\*

Department of Pharmaceutics, Utrecht Institute of Pharmaceutical Sciences (UIPS), Utrecht University, Universiteitsweg 99, 3584 CG Utrecht, The Netherlands; m.oktem@uu.nl (M.O); e.mastrobattista@uu.nl (E.M.)

\* Correspondence: [o.g.dejong@uu.nl](mailto:o.g.dejong@uu.nl)

**Table S1.** Guide RNA sequences used in this work.

| Target                  | sgRNA targeting sequence |
|-------------------------|--------------------------|
| Stoplight construct     | GGACAGUACUCCGCUCGAGU     |
| HDR stoplight construct | GCUUACUUGUACAGCUCGUCC    |
| CCR5                    | UGACAUCAAUUAUUAUACAU     |
| Non-target sgRNA        | GUUAAUGUGGCUCUGGUUCU     |

**Table S2.** PCR primers used for amplification of the Stoplight and CCR5 loci for both T7E1 and TIDE experiments.

| Primer name       | Sequence 5'-3'        |
|-------------------|-----------------------|
| Stoplight Forward | GAAGGGCGAGATCAAGCAGA  |
| Stoplight Reverse | GGTCTTGTAGTTGCCGTCGT  |
| CCR5 Forward      | CAACAGAGCCAAGCTCTCCAT |
| CCR5 Reverse      | CCTGGGAGAGACGCAAACAC  |

**Table S3.** Single stranded HDR DNA template sequence. DNA mismatches and encoding the mutation, are specified with small letter.

| HDR template name              | Template sequence 5'-3'                                                                                 |
|--------------------------------|---------------------------------------------------------------------------------------------------------|
| HDR stoplight 81bp             | ACGACGCCCCGTGAAAAGCTCTTCACCCCTTAGACACGGCTTgCTTGT<br>ACAGCTCGTCCAaGCCGCCCCGTAGAATCCCTGCCT                |
| Alexa 647 labeled HDR template | /Alex647N/<br>ACGACGCCCCGTGAAAAGCTCTTCACCCCTTAGACACGGCTTGCTTG<br>TACAGCTCGTCCAAGGCCGCCCCGTAGAATCCCTGCCT |

**Table S4.** crRNA sequence used in this research.

| Target | crRNA sequence                       |
|--------|--------------------------------------|
| HPRT   | CCUGACAAUCGAUAGGUACCGUUUUAGAGCUAUGCU |

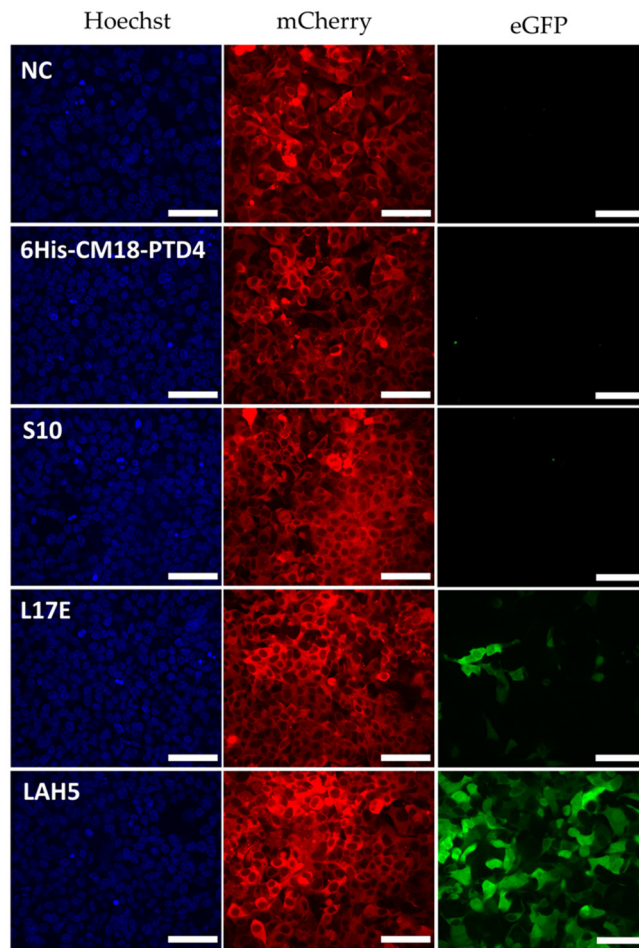

**Figure S1.** Screening of several amphipathic peptides to determine their capacity of delivering Cas9/RNPs. Confocal microscopy images (60x) of HEK293T stoplight cells after treatment with 1:150 molar ratio of RNP:peptide at a RNP concentration of 20 nM. Red – mCherry, green – eGFP (Cas9 gene editing), blue – Hoechst 33342 nuclear dye, NC: Negative control. A schematic depiction of the fluorescent Stoplight reporter construct is depicted in Figure 5A. Scale bar represents 100  $\mu$ m.

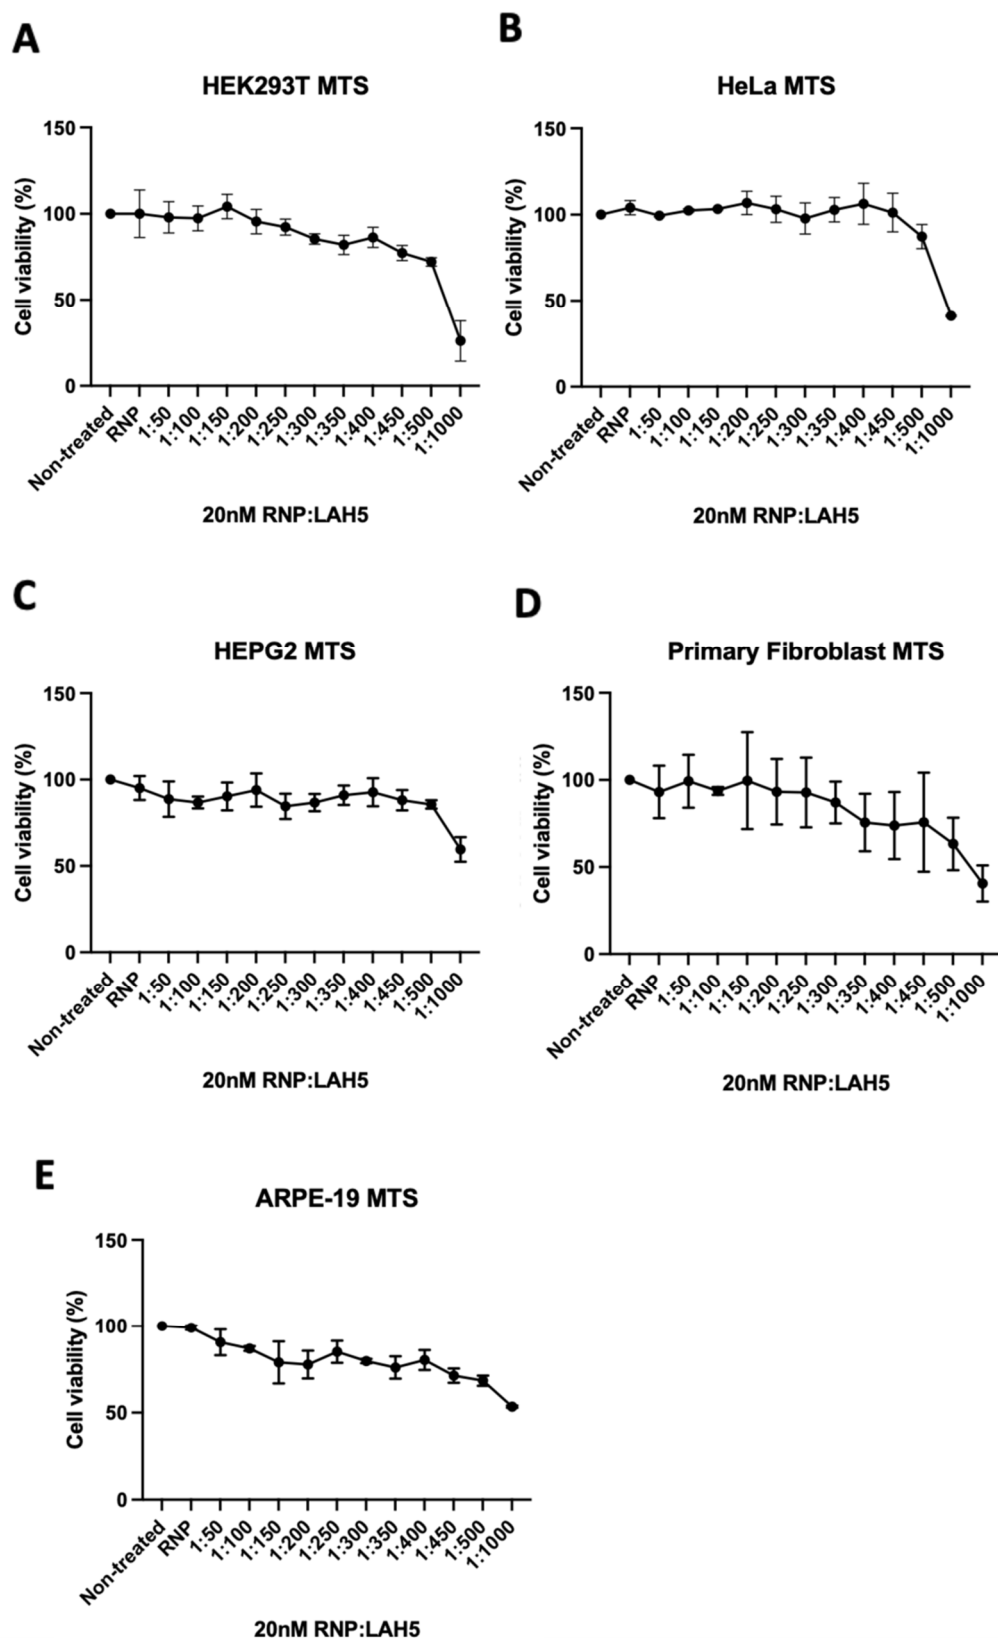

**Figure S2.** Cytotoxicity study using MTS assay on multiple cell lines: **(A)** HEK293T, **(B)** HeLa, **(C)** HEPG2, **(D)** Primary fibroblasts, **(E)** ARPE-19. RNP/LAH5 nanocomplexes were prepared at 1:50 to 1:1000 M/M ratios using 20nM RNP per well in 96-well plates. The medium was replaced with Opti-MEM containing 100  $\mu$ l of 20nM RNP complexed with increasing concentrations of LAH5 peptide. MTS assay was performed 24 h after treatment. Non-treated cells were used as a negative control and Triton X-100 (1%) treated cells were used as a positive control. Data are shown as mean  $\pm$  SD ( $n = 3$ ).

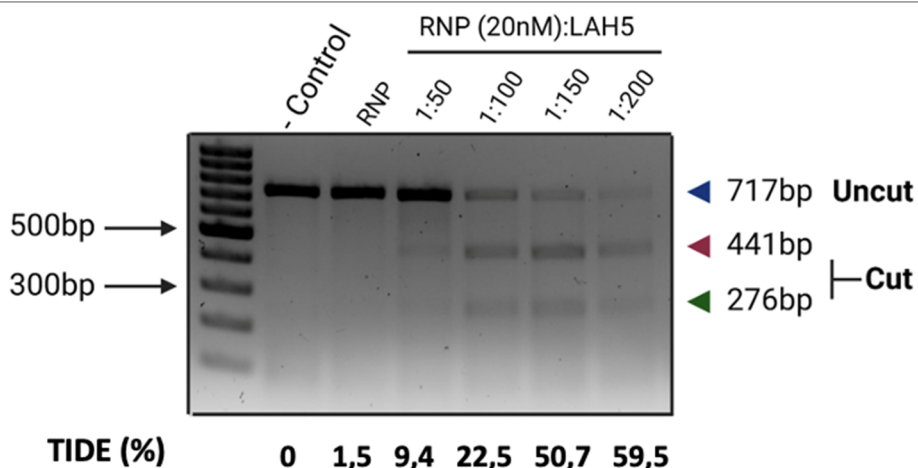

**Figure S3.** Gene editing efficiency was assessed in ARPE-19 cells, targeting the CCR5 gene. Indel measurements in the CCR5 locus from RNP/LAH5 treated ARPE-19 cells analyzed by T7E1 (top) and TIDE (bottom) assays (uncut, 717 bp; cut, 441 bp 276 bp; Cas9, 20 nM; CCR5 sgRNA, 20 nM; increasing ratios of LAH5).

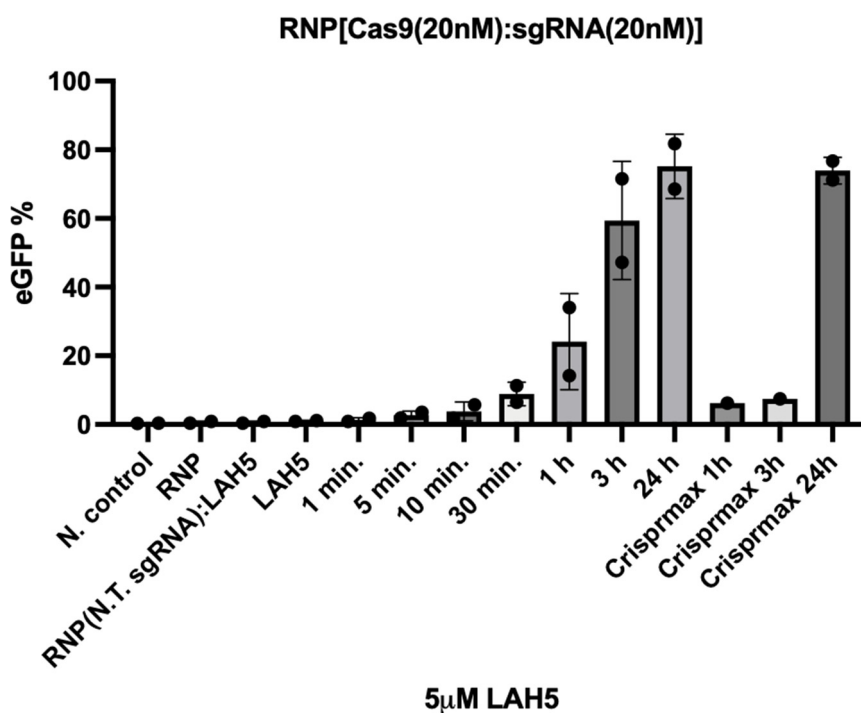

**Figure S4.** HEK293T stoplight cells were treated with RNP/LAH5 nanocomplexes during different incubation times with 20nM RNP and LAH5 (5µM) peptide. 48h following the transfection, gene editing efficiency (eGFP+ cells) was calculated by flow cytometry. Data are presented as mean ± SD (n = 2)

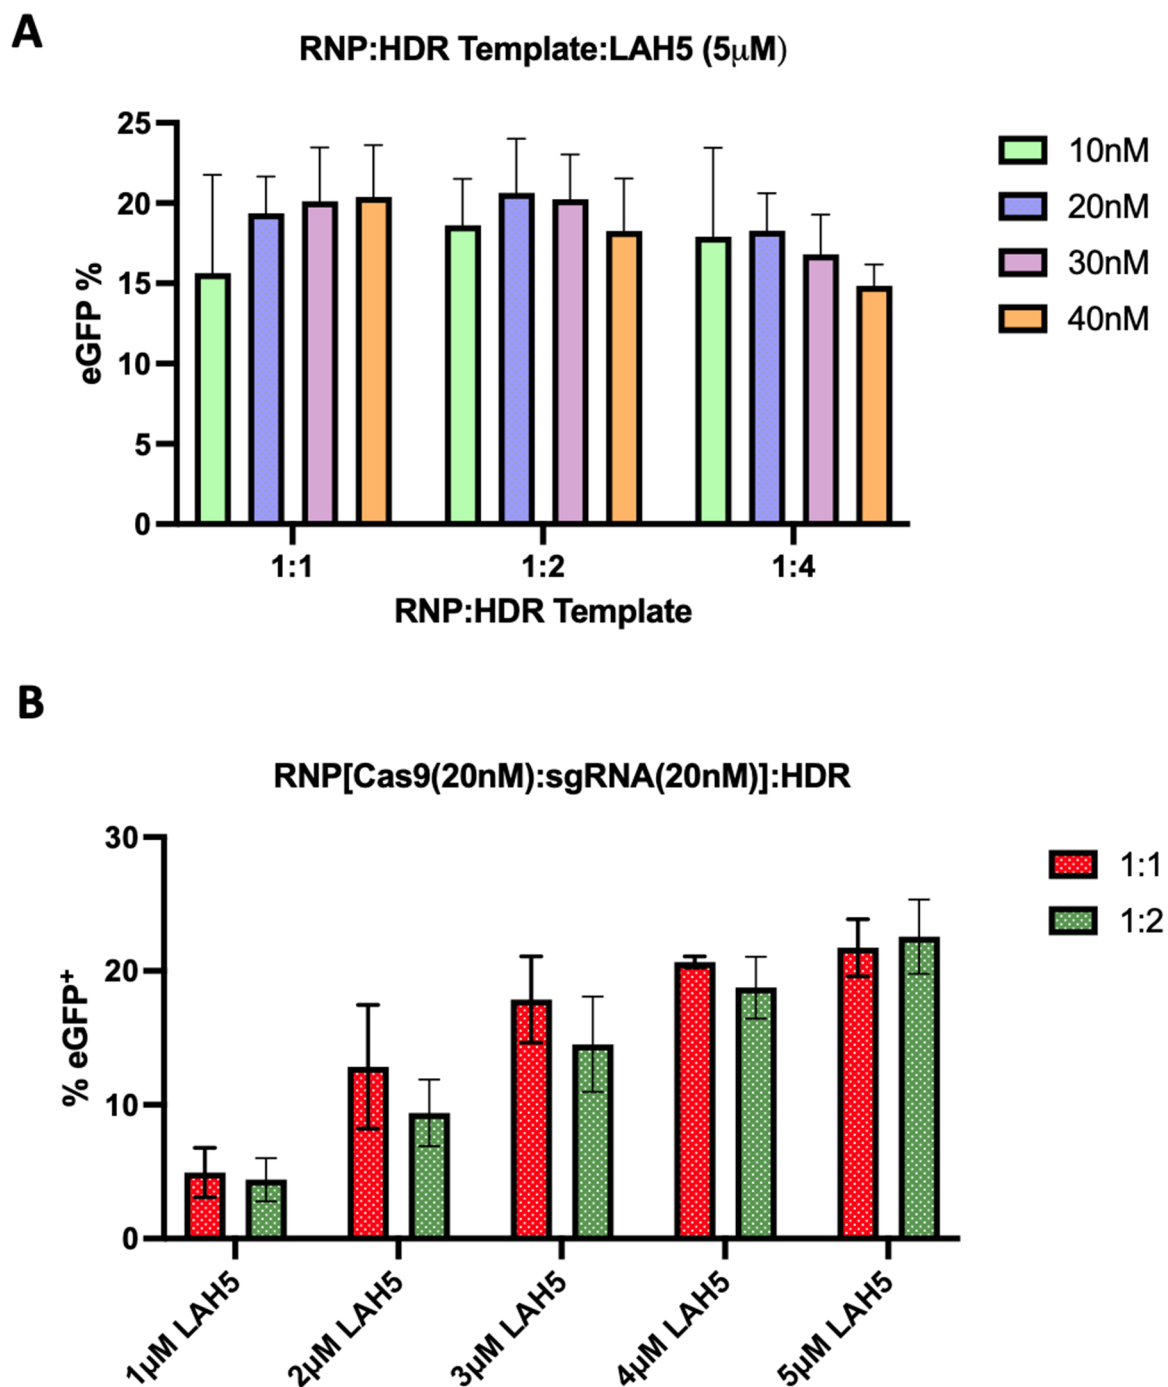

**Figure S5.** LAH5 peptide-mediated gene correction efficiency using the HDR stoplight reporter system. (A) To evaluate the impact of increasing concentrations of RNP/HDR template HEK293T HDR stoplight cells were treated with a range of 10nM to 40nM RNP/HDR template at 1:1, 1:2 and 1:4 ratios. These various RNP/HDR template concentrations were complexed with 5 $\mu$ M of LAH5 peptide. HDR efficiency was quantified by flow cytometry depending on % of eGFP expression (B) LAH5 peptide dose-dependent effects on gene correction were tested by treating the cells with RNP/HDR template/LAH5 nanocomplexes, which were prepared using RNP (20nM)/HDR template (20nM) and RNP (20nM)/HDR template (40nM) at an increasing concentration of LAH5 peptide (ranging from 1 $\mu$ M to 5 $\mu$ M). Data presented as mean  $\pm$  SD (n = 3).

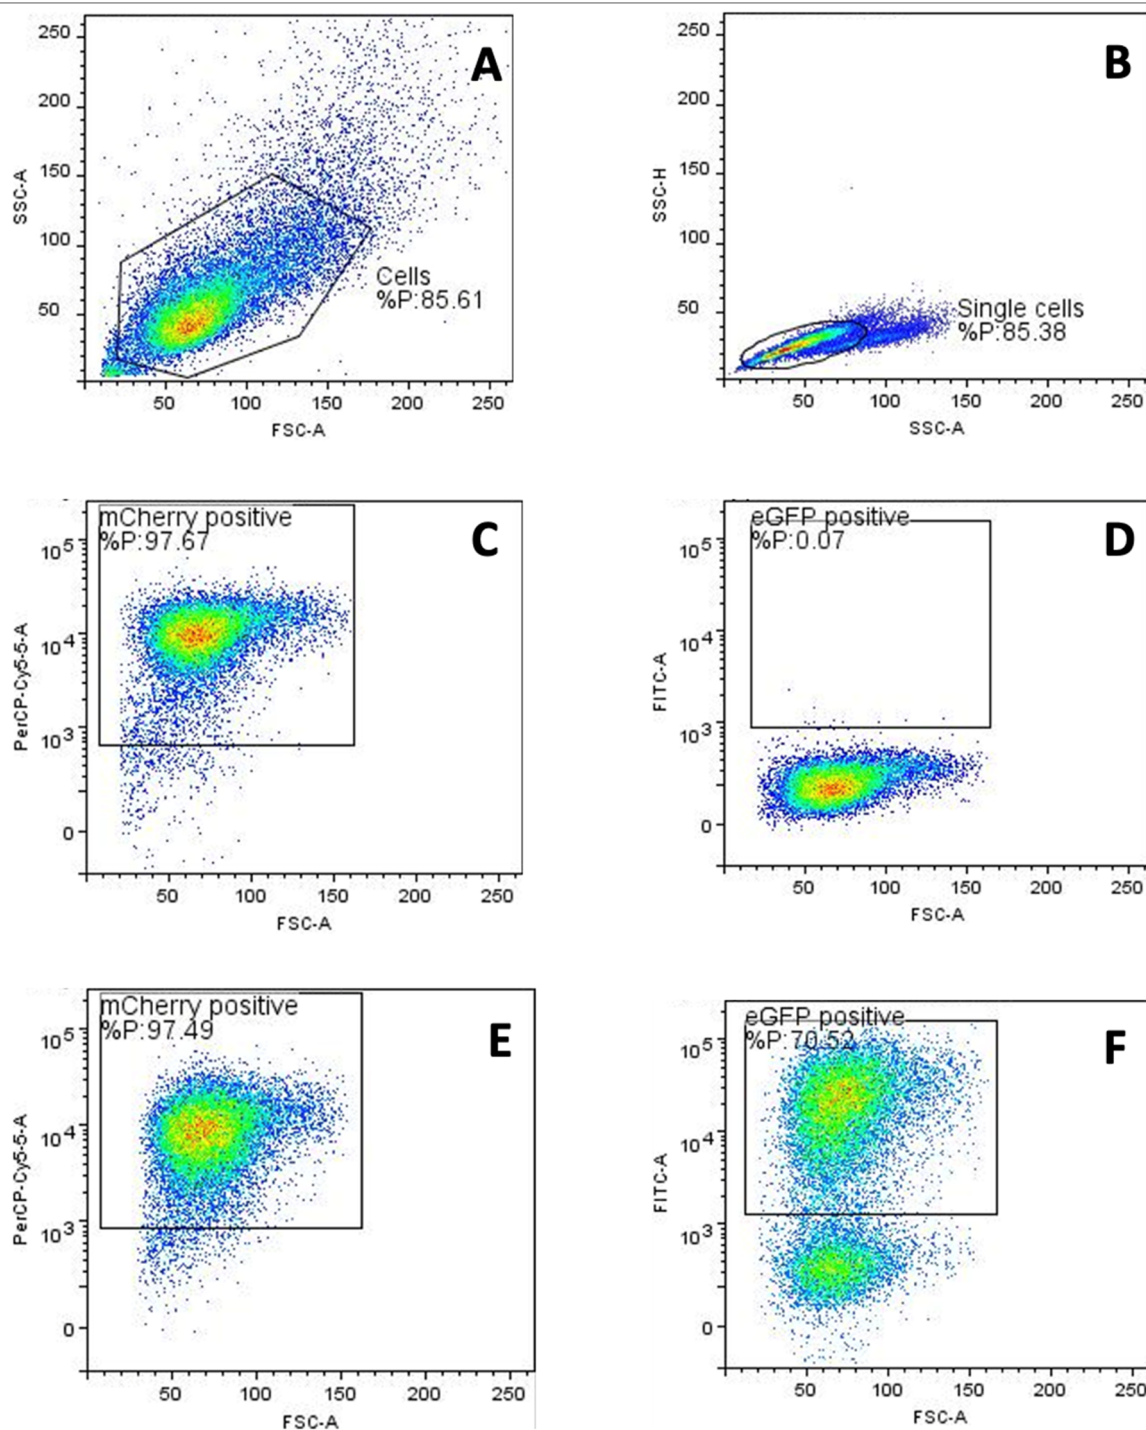

**Figure S6.** (A) and (B) gating strategy to analyze single cells in flow cytometry experiments using HEK293T reporter cells. Before eGFP analysis, mCherry positive cells are gated using the PerCP-Cy5.5 channel as shown for negative control samples (C) and cells transfected with a 1:200 ratio of RNP/LAH5 nanocomplexes. Within this gate, eGFP positive cells were analyzed using the FITC channel, as show for negative control samples (D) eGFP and cells transfected with a 1:200 ratio of RNP/LAH5 nanocomplexes (F).

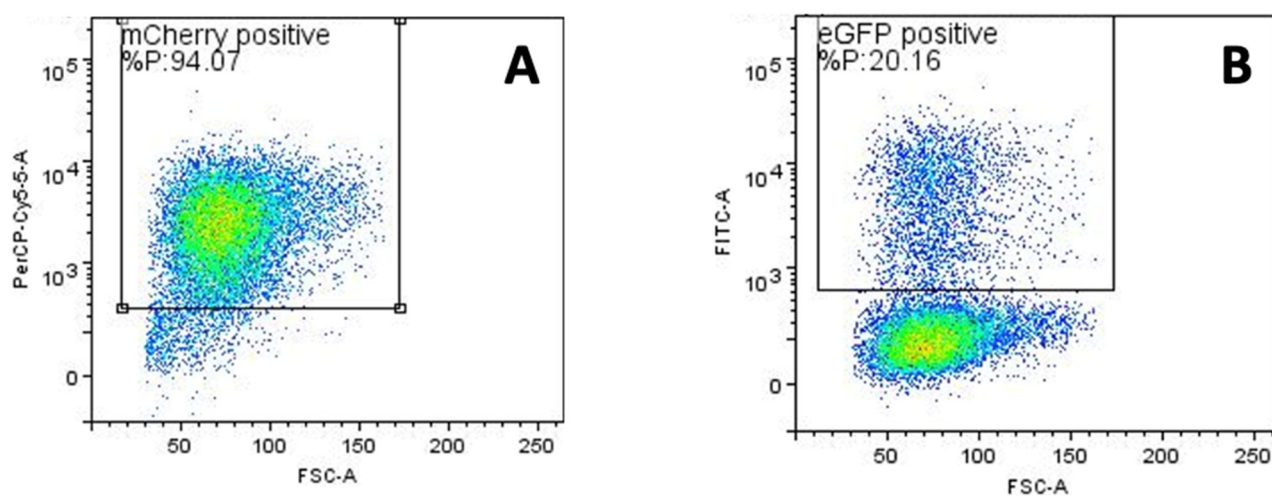

**Figure S7.** The gating strategy used to analyze HEK293T HDR stoplight cells treated with RNP/HDR template/LAH5 nanocomplexes prepared at 1:1:250 ratio **(A)** selection of mCherry positive population and **(B)** eGFP positive gene-corrected cells.

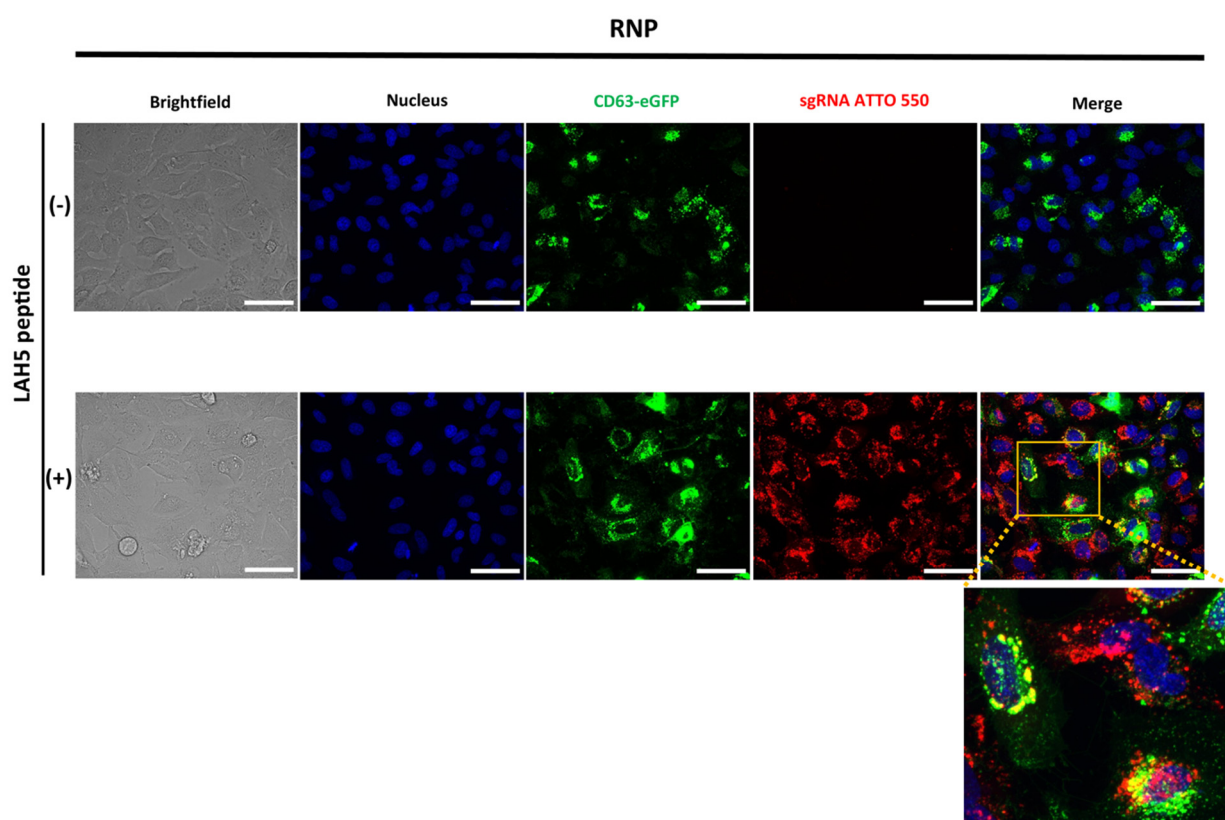

**Figure S8.** Fluorescence confocal microscopy images depicting the intracellular uptake of Cas9/sgrNA ATTO 550 (RNP), both with- and without LAH5 complexation, in HeLa cells transiently expressing CD63-eGFP. The merged channels demonstrate the co-localization (as indicated in yellow) of the CD63-eGFP late endosome marker and Cas9-sgrNA ATTO 550(RNP)/LAH5 nanocomplexes. No significant uptake of the Cas9/sgrNA ATTO 550 RNPs was observed without LAH5 complexation. Scale bars represent 70  $\mu$ m.
